# Supplementary material for: A novel single-labeled fluorescent oligonucleotide probe for silver(i) ion detection based on the inherent quenching ability of deoxyguanosines
Source: Royal Society of Chemistry journal article supplement (doi:10.1039/c0an00669f), 2010-12-15
Supplement: c0an00669f.pdf [file c0an00669f.pdf]

## Electronic Supplementary Information

# A Novel Single-Labeled Fluorescent Oligonucleotide Probe for Silver(I) Ion Detection Based on the Inherent Quenching Ability of Deoxyguanosines

Lei Wang,<sup>†</sup> Jingqi Tian,<sup>†‡</sup> Hailong Li,<sup>†‡</sup> Yingwei Zhang,<sup>†</sup> and Xuping Sun<sup>†\*</sup>

<sup>†</sup>State Key Lab of Electroanalytical Chemistry, Changchun Institute of Applied Chemistry, Chinese Academy of Sciences, Changchun 130022, Jilin, China

<sup>‡</sup>Graduate School of the Chinese Academy of Sciences, Beijing 100039, China

\*To whom correspondence should be addressed. Telephone/Fax: 0086-431-85262065. E-mail: sunxp@ciac.jl.cn

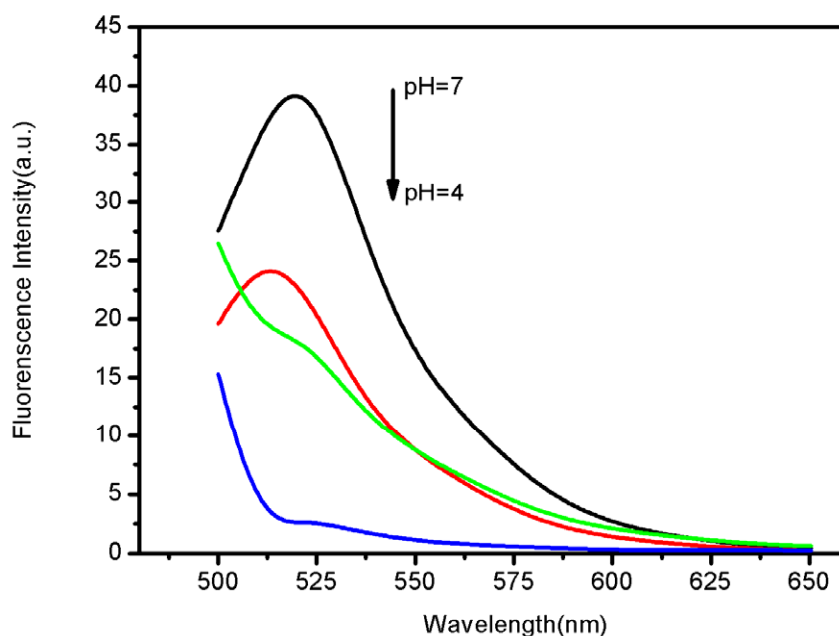

**Fig. S1.** Fluorescence emission spectra of FAM-OND (100 nM) at different pH (from top to bottom: 7, 6, 5, 4) in MOPS. Excitation was at 480 nm, and the emission was monitored at 520 nm.
